# Supplementary material for: Sodium Channel Gene Variants in Fetuses with Abnormal Sonographic Findings: Expanding the Prenatal Phenotypic Spectrum of Sodium Channelopathies
Source: MDPI journal article supplement (doi:10.3390/genes15010119), 2024-01-18
Supplement: s1 [file s1]

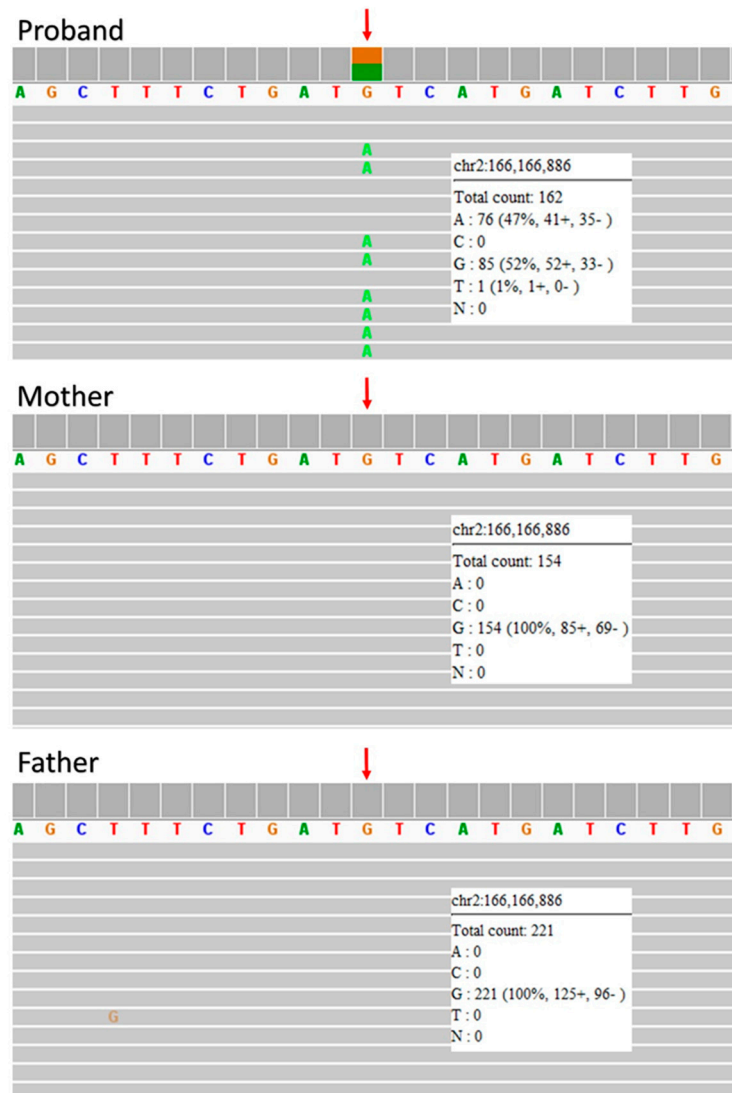

**Figure S1.** WES data aligned against hg19 reference genome, displayed on IGV tracks showing variant *SCN2A*:c.751G>A. The tracks represent the proband, mother and father in respective order where proband exhibits the variant in a de novo heterozygous manner, and both parents exhibit the wild type allele.

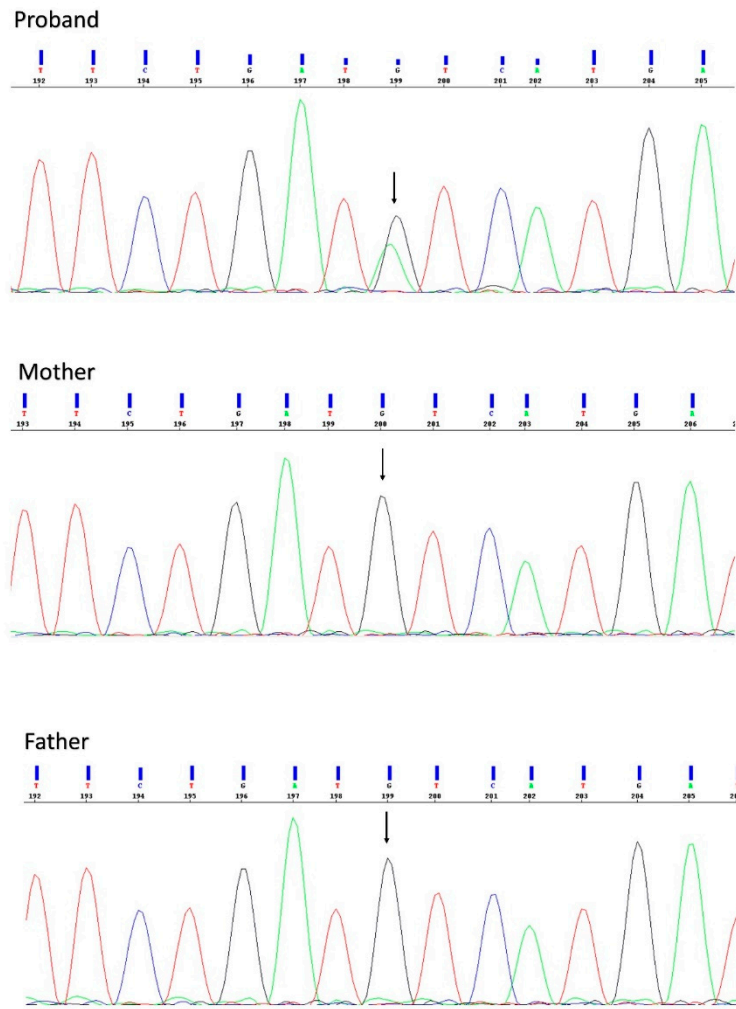

**Figure S2.** Sanger sequencing validation confirming the de novo origin of the variant *SCN2A*:c.751G>A in the proband, present in heterozygous state. Both parents are homozygous for the wild type (WT) allele.

### Proband

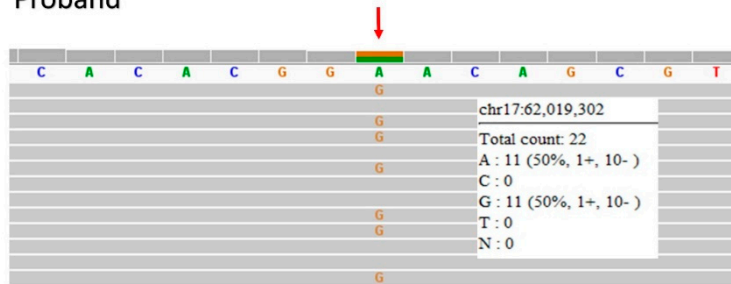

### Mother

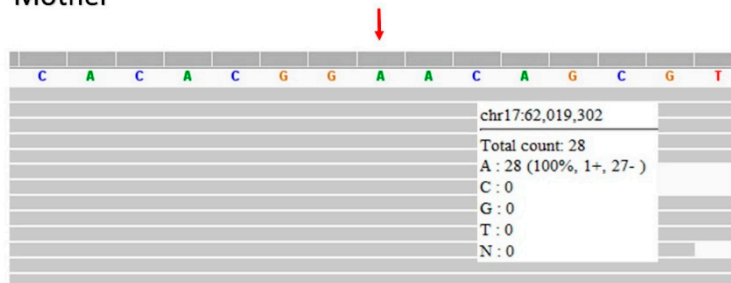

### Father

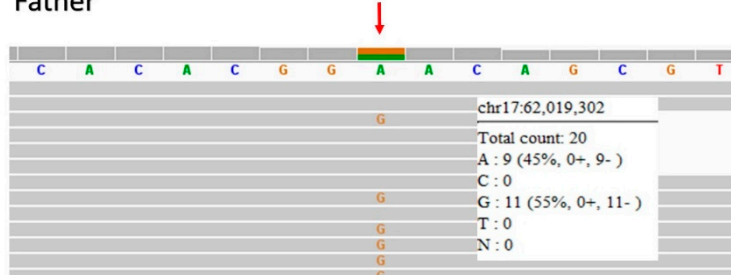

**Figure S3.** WES data aligned against hg19 reference genome, displayed on IGV tracks showing variant *SCN4A*:c.4340T>C in heterozygosity in the proband and father. The mother is homozygous for the wild type allele. The tracks represent proband, mother and father in respective order.

### Proband

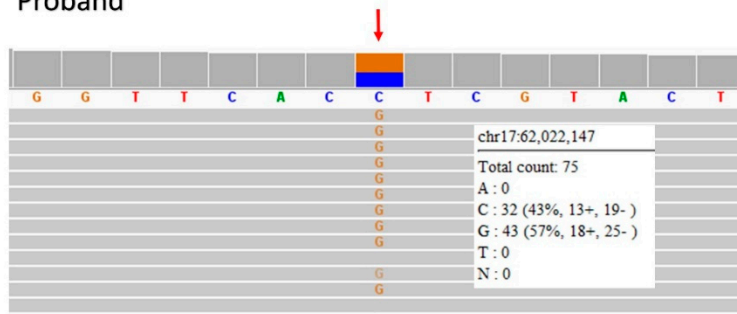

### Mother

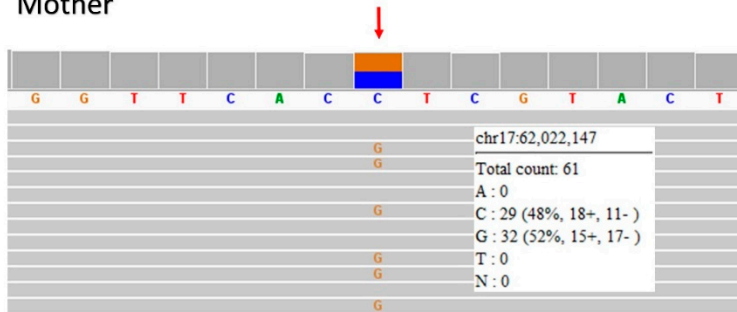

### Father

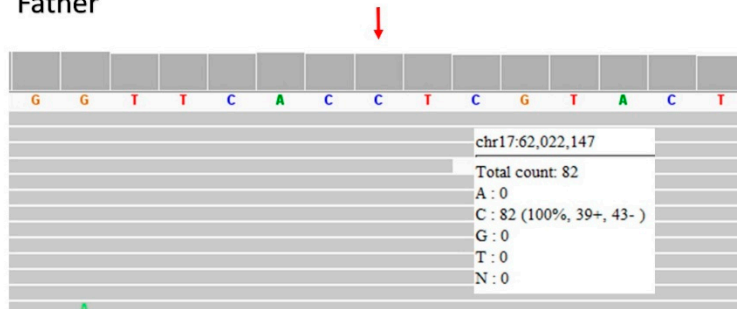

**Figure S4.** WES data aligned against hg19 reference genome, displayed on IGV tracks showing variant *SCN4A*:c.3798G>C in heterozygosity in the proband and mother. The father is homozygous for the wild type allele. The tracks represent proband, mother and father in respective order.

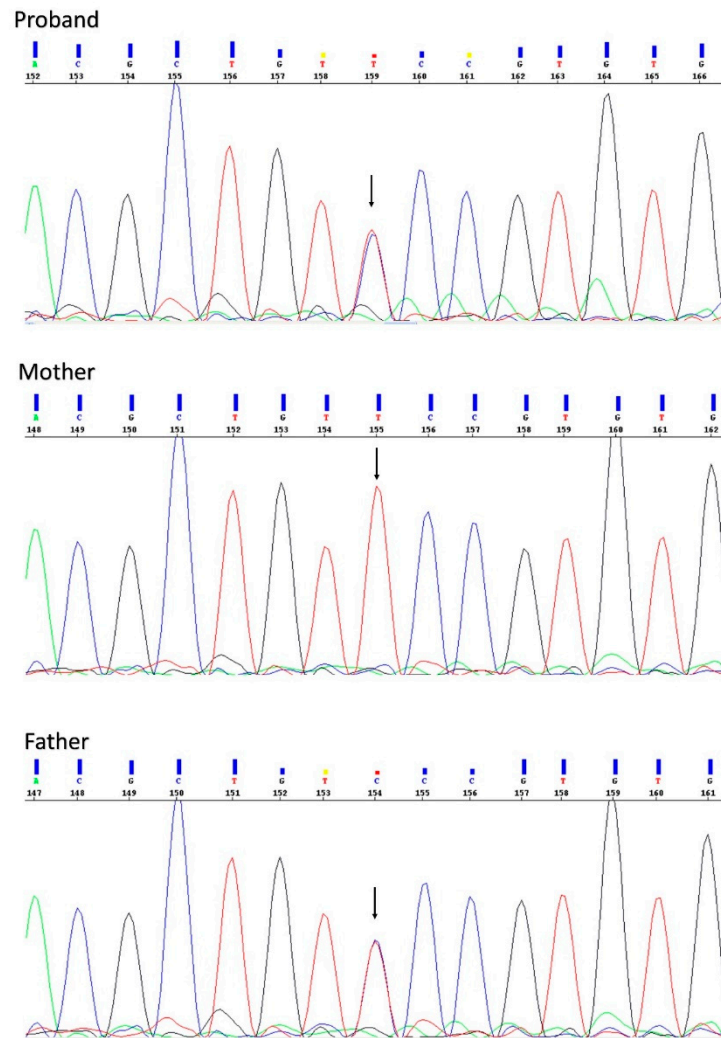

**Figure S5.** Sanger sequencing validation confirming the presence of *SCN4A*:c.4340T>C in heterozygosity in the proband and father. The mother is homozygous for the wild type allele.

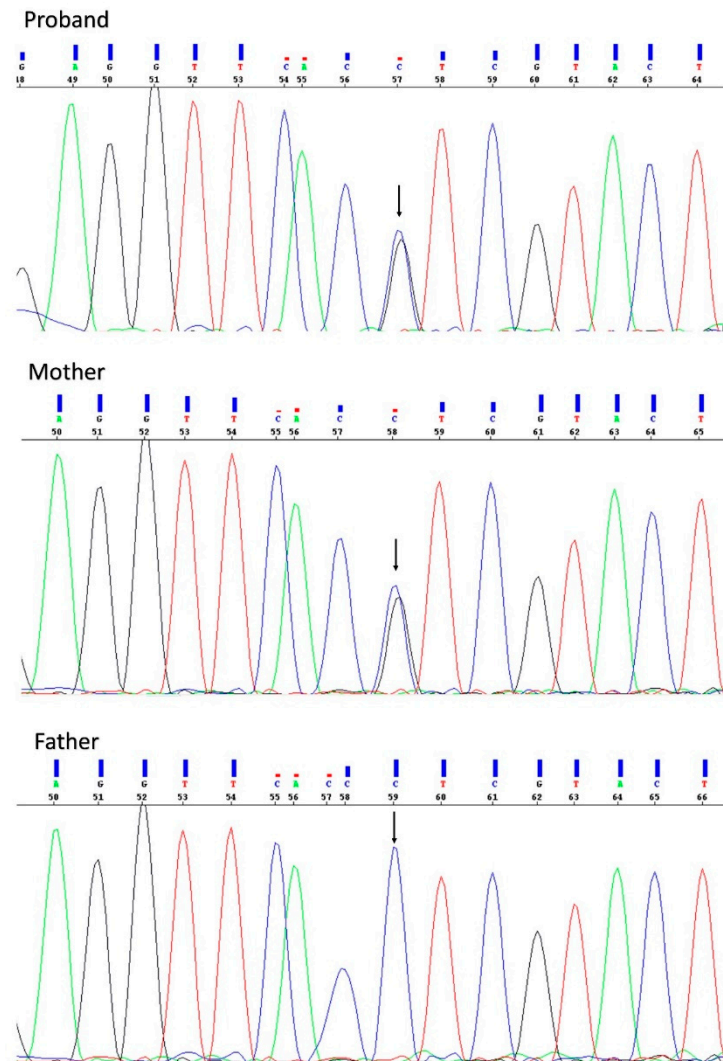

**Figure S6.** Sanger sequencing validation confirming the presence of *SCN4A*:c.3798G>C in heterozygosity in the proband and mother. The father is homozygous for the wild type allele.
